# Supplementary material for: A facile route to magnetic mesoporous core–shell structured silicas containing covalently bound cyclodextrins for the removal of the antibiotic doxycycline from water
Source: Royal Society of Chemistry journal article supplement (doi:10.1039/c8ra05781h), 2018-01-01
Supplement: c8ra05781h1.pdf [file c8ra05781h1.pdf]

Facile Route to magnetic mesoporous core–shell structured silicas  
Containing Covalently Bound Cyclodextrins for removal of doxycycline  
antibiotic from water

Ying Zhang<sup>a</sup>, Fuquan Jiang<sup>b</sup>, Danya Huang<sup>a</sup>, Shushan Hou<sup>a</sup>, Hongli Wang<sup>a</sup>,  
Minggang Wang<sup>a</sup>, Yue Chi<sup>a,\*</sup>, Zhankui Zhao<sup>a,\*</sup>

<sup>a</sup>College of Material Science and Engineering, Key Laboratory of Advanced  
Structural Materials, Ministry of Education, Changchun University of Technology,  
Changchun, 130012, China

<sup>b</sup>China-Japan Union Hospital, Jilin University, Changchun, 130012, China

\* Corresponding author. Tel.: +86 431 85716644; Fax: +86 431 85716644.  
E-mail addresses: yuechi@ccut.edu.cn (Y. Chi), zhaozk@ccut.edu.cn (Z. Zhao).

## 1. Preparation of $\text{Fe}_3\text{O}_4@\text{SiO}_2@\text{mSiO}_2$ microspheres

### 1.1. Synthesis of $\text{Fe}_3\text{O}_4$ microspheres

Typically, 1.08g of  $\text{FeCl}_3 \cdot 6\text{H}_2\text{O}$  was dissolved in 20mL of ethylene glycol under magnetic stirring. A clear yellow solution was obtained after stirring 30min at  $40^\circ\text{C}$ . Then, 1.8g of sodium trihydrate was added to this solution and being stirred for another 1h. Afterward, 0.25g of trisodium citrate was added. After forming a homogeneous dispersion, the mixture was transferred into a Teflon-lined stainless-steel and heated at  $200^\circ\text{C}$  for 10h. The black magnetic particles were collected with help of a magnet filed, followed by washing with a recycle of ethanol of deionized water six times. The product was then dried under vacuum at  $60^\circ\text{C}$ .

### 1.2. Synthesis of $\text{Fe}_3\text{O}_4@\text{SiO}_2$ microspheres

The coating layer of  $\text{SiO}_2$  was prepared through a modified Stöber method. In a typical process, as-prepared  $\text{Fe}_3\text{O}_4$  particles (0.1 g) were dispersed in a mixture of ethanol (40mL), 10mL of deionized water, concentrated ammonia aqueous solution (28 wt%, 1.2mL), 0.35mL of TEOS was added and ultrasonication 15min, 15min, 30min, 45min, respectively. The products were collected and washed with deionized water and ethanol and then dried vacuum at  $60^\circ\text{C}$ .

### 1.3. Synthesis of $\text{Fe}_3\text{O}_4@\text{SiO}_2@\text{mSiO}_2$ microspheres

Briefly, 0.6g CTAB was dissolved in deionized water (24mL) by vigorous mechanical stirring to obtain a clear solution. Then, 0.2g TEA and 36mL of deionized water mixed solution was added and continue vigorous mechanical stirring for 30min.

0.2g  $\text{Fe}_3\text{O}_4@\text{SiO}_2$  microspheres was added and treated ultrasonication for 30min. Afterwards, 2mL of TEOS and 18mL of cyclohexane added. The mixture was under ultrasonication for 30min and then mechanically stirred at  $60^\circ\text{C}$  for 12h. The products were collected and washed with deionized water and ethanol and then dried vacuum at  $60^\circ\text{C}$ . Finally, the product was calcined at  $550^\circ\text{C}$  for 6h.

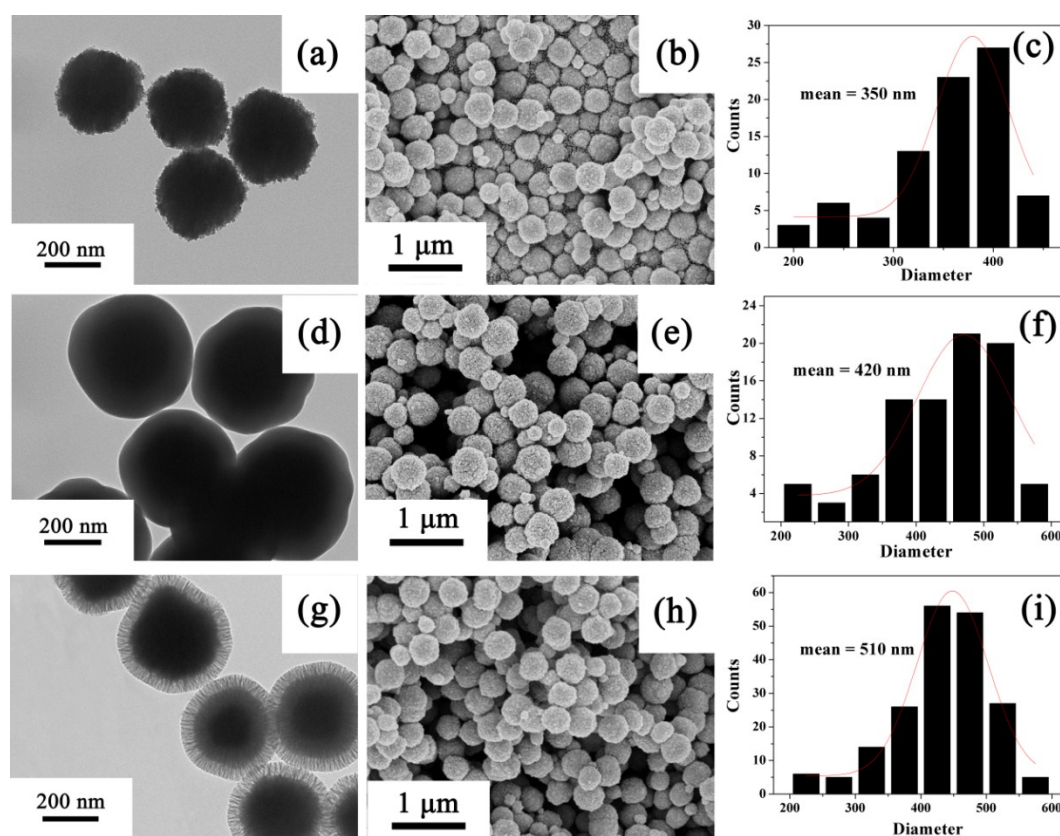

**Fig. S1.** TEM images of  $\text{Fe}_3\text{O}_4$  (a),  $\text{Fe}_3\text{O}_4@\text{SiO}_2$  (d) and  $\text{Fe}_3\text{O}_4@\text{SiO}_2@m\text{SiO}_2$  (g) microspheres, SEM images of  $\text{Fe}_3\text{O}_4$  (b),  $\text{Fe}_3\text{O}_4@\text{SiO}_2$  (e) and  $\text{Fe}_3\text{O}_4@\text{SiO}_2@m\text{SiO}_2$  (h) microspheres. Size distribution histogram of  $\text{Fe}_3\text{O}_4$  (c),  $\text{Fe}_3\text{O}_4@\text{SiO}_2$  (f) and  $\text{Fe}_3\text{O}_4@\text{SiO}_2@m\text{SiO}_2$  (i) microspheres calculated from SEM images.

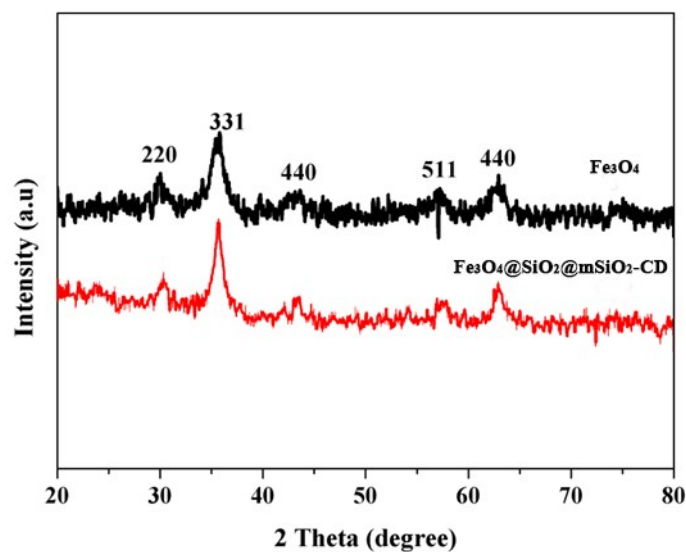

**Fig. S2.** XRD patterns of the  $\text{Fe}_3\text{O}_4$  and the  $\text{Fe}_3\text{O}_4@\text{SiO}_2@\text{mSiO}_2\text{-CD}$  microspheres.

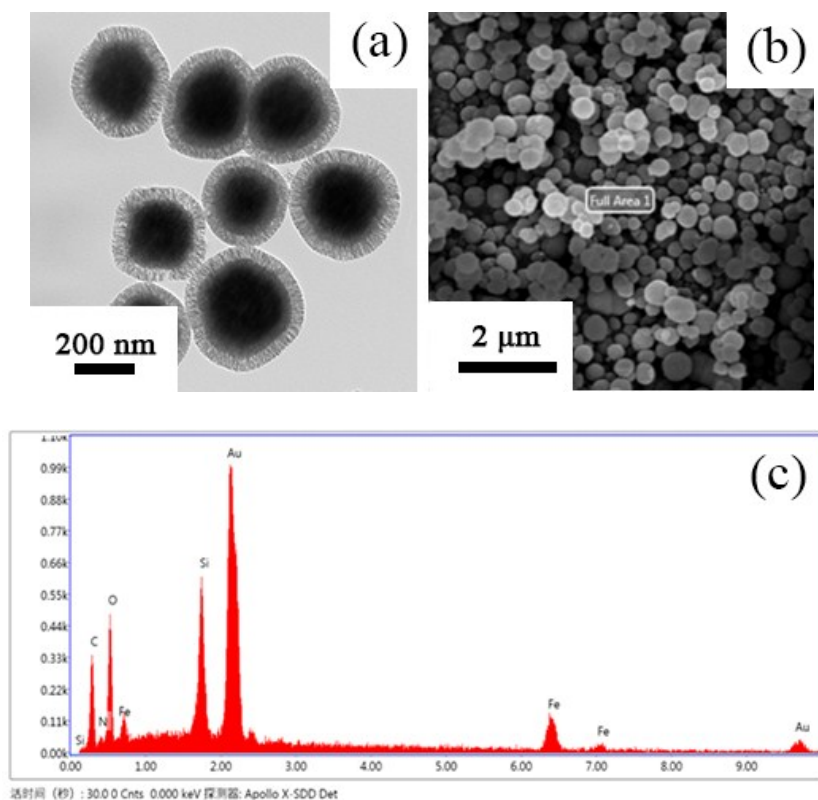

**Fig. S3.** TEM of images of  $\text{Fe}_3\text{O}_4@\text{SiO}_2@\text{mSiO}_2\text{-CD}$  (a), SEM images of  $\text{Fe}_3\text{O}_4@\text{SiO}_2@\text{mSiO}_2\text{-CD}$  and  $\text{Fe}_3\text{O}_4@\text{SiO}_2@\text{mSiO}_2\text{-CD}$  energy dispersive spectrometer (EDX) from SEM images.

**Eqs.S1.** The pseudo-first order kinetic model:  $\ln(q_e - q_t) = \ln q_e - k_1 t$

The pseudo-second order equation:  $\frac{t}{q_t} = \frac{1}{k_2 q_e^2} + \frac{t}{q_e}$

Where,  $q_e$  and  $q_t$ ,  $\text{mg g}^{-1}$ , are equilibrium adsorption capacity and adsorption capacity at time  $t$ , respectively;  $k_1$  ( $\text{min}^{-1}$ ),  $k_2$  ( $\text{g mg}^{-1}\text{h}^{-1}$ ) are the pseudo-first-second order kinetic rate constant, respectively.

**Eqs.S2.** The Langmuir, Freundlich and D-R isotherm models are shown below:

Langmuir models:  $q_e = \frac{Q_{\max} K_L C_e}{1 + K_L C_e}$

Freundlich models:  $q_e = K_F C_e^{1/n}$

Dubinin-Radushkevich models:  $\ln q_e = \ln q_m - \beta \varepsilon^2$

$$\varepsilon = RT \ln \left( 1 + \frac{1}{C_e} \right)$$

$$E = (2\beta)^{-1/2}$$

Where  $Q_{\max}$  is the maximum adsorption capacity ( $\text{mg g}^{-1}$ ),  $n$  is a dimensionless number related to surface heterogeneity,  $K_F$  is Freundlich affinity coefficient ( $\text{mg}^{1-n} \text{L}^n \text{g}^{-1}$ ) and  $K_L$  is the Langmuir fitting parameter ( $\text{L mg}^{-1}$ ),  $\beta$  is a constant related to sorption energy;  $\varepsilon$  is Polanyi sorption potential, related to the sorption energy  $E$  required to move one molecule of solute from infinity to the surface of adsorbents.  $R$  is the ideal gas constant ( $8.314 \text{ J mol}^{-1} \text{ K}^{-1}$ ) and  $T$  is the temperature (K).

**Eqs.S3.** The thermodynamic parameters, such as the Gibbs free energy ( $\Delta G^0$ ), the enthalpy ( $\Delta H^0$ ), the entropy ( $\Delta S^0$ ) were calculated using the following equations:

$$\Delta G = -RT \ln K_c$$

$$\ln K_c = \frac{\Delta S^0}{R} - \frac{\Delta H^0}{RT}$$

Where  $K_c$  is the distribution coefficient, which is the ratio of the amount of DOX adsorbed on solid to the residual concentration of DOX in solution at equilibrium.
